# Supplementary material
Source: PubMed Central journal article supplement (PMC6861837)

## Supplemental Digital Content

**Table 1 Supplementary File-** Lung cancer detection modality, stage and histology, cause of death and corresponding all-cause and lung cancer-specific mortality rates (/100,000 person-years) by study (Italy, 2001-2011).

|                          | DANTE study |            |        | MILD study |            |        |
|--------------------------|-------------|------------|--------|------------|------------|--------|
|                          | LDCT arm    | CTRL group | All    | LDCT arm   | CTRL group | All    |
| Nr. of subjects          | 1264        | 1186       | 2450   | 2376       | 1723       | 4099   |
| Total patients with LC   | 104         | 72         | 176    | 88         | 33         | 121    |
| Total deaths             | 180         | 176        | 356    | 102        | 62         | 164    |
| Person-years FU          | 10,875      | 10,104     | 20,979 | 19,605     | 12,053     | 31,658 |
| <i>Mode of detection</i> |             |            |        |            |            |        |
| Screen detected          | 67          | 10         | 77     | 69         | 0          | 69     |
| Interval cancer          | 37          | 62         | 99     | 19         | 33         | 52     |
| <i>Stage</i>             |             |            |        |            |            |        |
| IA                       | 31          | 6          | 37     | 37         | 6          | 43     |
| IB                       | 16          | 10         | 26     | 7          | 0          | 7      |
| II                       | 7           | 5          | 12     | 4          | 2          | 6      |
| Other <sup>a</sup>       | 50          | 51         | 101    | 41         | 24         | 65     |
| <i>Histotype</i>         |             |            |        |            |            |        |
| Adenocarcinoma           | 44          | 19         | 63     | 51         | 10         | 61     |
| Squamous cell carcinoma  | 25          | 17         | 42     | 16         | 5          | 21     |
| Other <sup>a</sup>       | 35          | 36         | 71     | 21         | 18         | 39     |
| <i>Cause of death</i>    |             |            |        |            |            |        |
| Cancer of the lung       | 59          | 55         | 114    | 32         | 24         | 56     |
| Cancer of other organs   | 54          | 59         | 113    | 41         | 16         | 57     |

|                    |    |    |     |    |    |    |
|--------------------|----|----|-----|----|----|----|
| Other <sup>b</sup> | 67 | 62 | 129 | 29 | 22 | 51 |
|--------------------|----|----|-----|----|----|----|

***All-cause mortality***

|                            |      |      |      |     |     |     |
|----------------------------|------|------|------|-----|-----|-----|
| Rate /100,000 person-years | 1655 | 1742 | 1697 | 520 | 514 | 518 |
|----------------------------|------|------|------|-----|-----|-----|

***Lung cancer mortality***

|                            |     |     |     |     |     |     |
|----------------------------|-----|-----|-----|-----|-----|-----|
| Rate /100,000 person-years | 543 | 544 | 543 | 163 | 199 | 177 |
|----------------------------|-----|-----|-----|-----|-----|-----|

---

<sup>a</sup> Including missing values

<sup>b</sup> One patient died of disseminated cancer of unknown origin, and one died of unknown causes in a foreign country

CTRL: control; LDCT: low-dose spiral computed tomography; MILD: Multicentric Italian Lung Detection trial

**Table 2 Supplementary File** - Results from the Cox proportional hazard models on overall survival and lung cancer specific mortality in LDCT group versus control group, in selected subsets of subjects (Italy, 2001-2011).

|                                                    | Overall mortality |                 |           | Lung cancer specific mortality |           |
|----------------------------------------------------|-------------------|-----------------|-----------|--------------------------------|-----------|
|                                                    | N                 | HR <sup>b</sup> | 95% CI    | HR <sup>b</sup>                | 95% CI    |
| No NLST criteria <sup>a</sup>                      | 2338              | 1.31            | 0.85-2.02 | 0.91                           | 0.40-2.06 |
| Age≥55 only                                        | 907               | 1.66            | 0.99-2.78 | 1.62                           | 0.57-4.64 |
| Pack-years≥30 only                                 | 1010              | 0.82            | 0.33-1.98 | 0.46                           | 0.10-2.11 |
| NLST criteria <sup>a</sup>                         | 4211              | 0.80            | 0.66-0.97 | 0.82                           | 0.59-1.14 |
| NLST criteria <sup>a</sup> and<br>FEV1<80%         | 548               | 0.87            | 0.56-1.37 | 0.94                           | 0.48-1.85 |
| Age≥55 and FEV1<80%                                | 648               | 0.99            | 0.65-1.50 | 0.98                           | 0.53-1.80 |
| Pack-years≥30 and<br>FEV1<80%                      | 640               | 0.87            | 0.56-1.37 | 0.93                           | 0.48-1.83 |
| Current smokers with<br>NLST criteria <sup>a</sup> | 2579              | 0.73            | 0.57-0.93 | 0.71                           | 0.48-1.06 |
| Ex smokers with NLST<br>criteria                   | 1445              | 1.27            | 0.88-1.84 | 1.59                           | 0.74-3.39 |

<sup>a</sup>Age≥55 and pack-years≥30

<sup>b</sup> Model adjusted for study, sex, age (continuous), pack-years (continuous) and FEV1 (continuous)

CI: confidence interval; FEV1: forced expiratory volume in 1 second; HR: hazard ratio

**Figure 1 Supplementary File** – Cumulative probability of death from all-causes in former smokers (Panel A) and current smokers (Panel B) at baseline (Italy, 2001-2011).

Panel A –  $p=0.17$

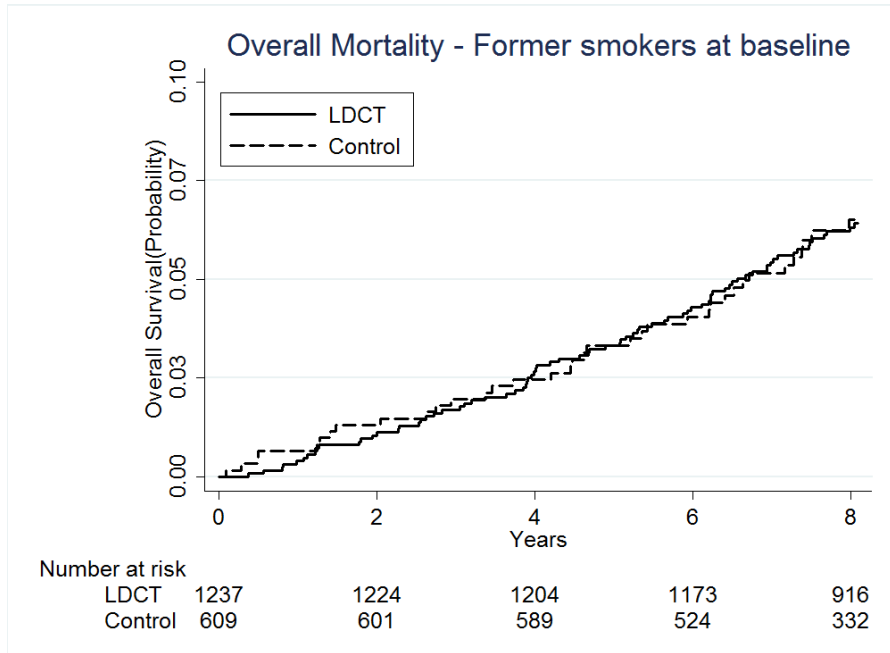

Panel B –  $p=0.52$

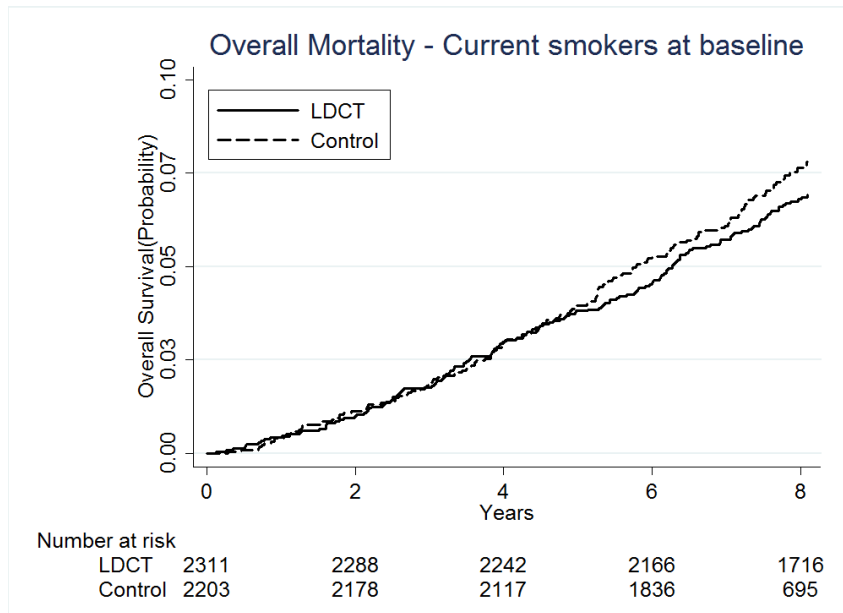

Supplement: NIHMS1057178-supplement-Supplemental.pdf [file NIHMS1057178-supplement-Supplemental.pdf]
